# Supplementary material for: Persistent Inflammatory Stimulation Drives the Conversion of MSCs to Inflammatory CAFs That Promote Pro-Metastatic Characteristics in Breast Cancer Cells
Source: MDPI journal article supplement (doi:10.3390/cancers13061472), 2021-03-23
Supplement: s1 [file s1]

**Supplementary Table S1**

|    | Gene      | Fold change | padj     |
|----|-----------|-------------|----------|
| 1  | MIR3142HG | 1.18E+04    | 2.1E-06  |
| 2  | GPR4      | 8.61E+03    | 4.81E-06 |
| 3  | CXCL5     | 6.90E+03    | 5.3E-271 |
| 4  | BCL2A1    | 6.10E+03    | 1.59E-05 |
| 5  | ADAMTS18  | 5.70E+03    | 2.69E-05 |
| 6  | CXCL6     | 4.28E+03    | 1.4E-213 |
| 7  | MMP3      | 3.52E+03    | 8.8E-107 |
| 8  | IL1B      | 2.76E+03    | 4.1E-113 |
| 9  | CSF3      | 2.32E+03    | 7.74E-26 |
| 10 | MMP8      | 2.25E+03    | 0.000142 |
| 11 | CXCL3     | 2.06E+03    | 8.9E-104 |
| 12 | CXCL1     | 1.86E+03    | 7.11E-68 |
| 13 | CXCL8     | 1.83E+03    | 3.9E-55  |
| 14 | PPBP      | 1.71E+03    | 0.000231 |
| 15 | CCL20     | 1.60E+03    | 4.24E-12 |
| 16 | MMP9      | 1.54E+03    | 0.000738 |
| 17 | HEPHL1    | 1.32E+03    | 4.63E-30 |
| 18 | PF4       | 1.25E+03    | 0.000458 |
| 19 | SOX17     | 1.14E+03    | 0.004705 |
| 20 | IL1A      | 1.03E+03    | 7.05E-57 |
| 21 | CSF2      | 1.03E+03    | 1.26E-37 |
| 22 | LCP1      | 9.13E+02    | 5.22E-10 |
| 23 | MMP13     | 8.99E+02    | 0.00096  |
| 24 | SPRR2A    | 8.90E+02    | 0.001049 |
| 25 | EHF       | 8.14E+02    | 4.12E-35 |
| 26 | MMP1      | 8.08E+02    | 6.01E-37 |
| 27 | SLC7A2    | 7.95E+02    | 3.26E-24 |
| 28 | SERPINA9  | 7.79E+02    | 6.17E-90 |
| 29 | CCL7      | 7.22E+02    | 0.001911 |
| 30 | SNCB      | 6.56E+02    | 0.002442 |

|    | Gene          | Fold change | padj      |
|----|---------------|-------------|-----------|
| 31 | MMP10         | 5.68E+02    | 0.002205  |
| 32 | GPR84         | 5.33E+02    | 0.002733  |
| 33 | SERPINB4      | 5.29E+02    | 1.23E-08  |
| 34 | CD93          | 4.97E+02    | 0.003351  |
| 35 | DNER          | 4.92E+02    | 4.23E-48  |
| 36 | C15orf48      | 4.51E+02    | 5.29E-29  |
| 37 | CAMK1G        | 4.51E+02    | 0.005553  |
| 38 | NKX2-6        | 4.43E+02    | 0.003989  |
| 39 | LINC00996     | 4.41E+02    | 0.003518  |
| 40 | LINC01050     | 4.36E+02    | 0.003797  |
| 41 | CTD-3128G10.7 | 4.23E+02    | 0.003642  |
| 42 | SLAMF7        | 4.08E+02    | 0.00353   |
| 43 | CITF22-49D8.1 | 3.93E+02    | 0.004517  |
| 44 | CCL3          | 3.90E+02    | 3.17E-08  |
| 45 | LINC00519     | 3.89E+02    | 0.004586  |
| 46 | RP11-13A1.1   | 3.87E+02    | 0.004932  |
| 47 | MMP12         | 3.86E+02    | 8.43E-17  |
| 48 | RP11-753N8.1  | 3.84E+02    | 0.005071  |
| 49 | CTD-2369P2.8  | 3.80E+02    | 0.004825  |
| 50 | SLC26A9       | 3.64E+02    | 0.005356  |
| 51 | PI3           | 3.61E+02    | 0.006541  |
| 52 | SPSB4         | 3.49E+02    | 0.005392  |
| 53 | DSCAM         | 3.36E+02    | 0.006141  |
| 54 | AZGP1         | 3.35E+02    | 0.005737  |
| 55 | CXCL2         | 3.30E+02    | 4.14E-100 |
| 56 | SERPINA12     | 3.29E+02    | 0.006155  |
| 57 | MUC13         | 3.25E+02    | 0.018663  |
| 58 | CDCP1         | 3.20E+02    | 2.87E-152 |
| 59 | GNA15         | 3.07E+02    | 0.007575  |
| 60 | KDR           | 3.03E+02    | 0.006941  |

**Persistent stimulation of MSCs with TNF $\alpha$ +IL-1 $\beta$ : 60 top up-regulated genes**

Human MSCs were exposed to persistent TNF $\alpha$ +IL-1 $\beta$  stimulation (concentrations as in Fig. 1) or to vehicles for 14-18 days. mRNA expression was determined by transcriptome analyses performed with 3 independent biological repeats. Differentially expressed genes were determined as those having padj<0.05 values. The Table presents the 60 top up-regulated genes following TNF $\alpha$ +IL-1 $\beta$  stimulation, compared to treatment by vehicle.

**Supplementary Table S2**

|    | Gene        | Fold change | padj        |
|----|-------------|-------------|-------------|
| 1  | COL14A1     | 1.12E-02    | 9.61E-14    |
| 2  | HR          | 1.12E-02    | 1.91E-11    |
| 3  | TLX2        | 1.11E-02    | 0.038303508 |
| 4  | CTC-537E7.1 | 1.10E-02    | 0.045325616 |
| 5  | LINC01013   | 1.10E-02    | 3.73E-08    |
| 6  | CRLF1       | 1.02E-02    | 3.67E-13    |
| 7  | FEM1AP2     | 1.01E-02    | 0.038141208 |
| 8  | LAMP5       | 1.01E-02    | 2.11E-08    |
| 9  | LYVE1       | 1.01E-02    | 0.03803195  |
| 10 | RP3-495K2.2 | 9.94E-03    | 0.038268869 |
| 11 | INPP5D      | 9.09E-03    | 0.030315785 |
| 12 | B3GALT2     | 9.05E-03    | 9.81E-35    |
| 13 | GJA5        | 9.01E-03    | 0.030138004 |
| 14 | FLG         | 8.80E-03    | 2.99E-34    |
| 15 | SLC1A7      | 8.50E-03    | 2.46E-05    |
| 16 | PLCE1-AS1   | 8.03E-03    | 1.74E-56    |
| 17 | CPZ         | 7.76E-03    | 1.28E-05    |
| 18 | WNT8B       | 7.71E-03    | 0.02709509  |
| 19 | TMEM130     | 7.56E-03    | 1.37E-34    |
| 20 | TM4SF20     | 7.35E-03    | 2.01E-13    |
| 21 | ALDH3A1     | 7.15E-03    | 2.61E-09    |
| 22 | OSTN        | 7.09E-03    | 0.022417142 |
| 23 | LINC01133   | 6.94E-03    | 5.54E-56    |
| 24 | LGR5        | 6.49E-03    | 2.57E-10    |
| 25 | NPR3        | 6.17E-03    | 2.85E-32    |
| 26 | ECM2        | 6.05E-03    | 1.08E-21    |
| 27 | GPR78       | 5.85E-03    | 0.016157466 |
| 28 | MLC1        | 5.84E-03    | 1.06E-05    |
| 29 | RAMP1       | 5.64E-03    | 1.11E-36    |
| 30 | LSP1        | 5.41E-03    | 3.81E-16    |

|    | Gene           | Fold change | padj        |
|----|----------------|-------------|-------------|
| 31 | ASPN           | 5.35E-03    | 0.014474934 |
| 32 | ADH1B          | 5.26E-03    | 2.14E-07    |
| 33 | RP11-88H9.2    | 4.95E-03    | 0.019599069 |
| 34 | KRT16P4        | 4.57E-03    | 0.011788615 |
| 35 | SCN3A          | 4.46E-03    | 3.20E-12    |
| 36 | CLCNKB         | 4.32E-03    | 0.013592169 |
| 37 | RP11-138I17.1  | 4.19E-03    | 0.010508598 |
| 38 | P2RX1          | 3.94E-03    | 0.015831994 |
| 39 | NTRK2          | 3.87E-03    | 3.21E-19    |
| 40 | CSPG4P13       | 3.71E-03    | 0.008755354 |
| 41 | KRT14          | 3.68E-03    | 2.13E-71    |
| 42 | RP11-757O6.1   | 3.06E-03    | 0.006325107 |
| 43 | S100B          | 2.92E-03    | 0.01002531  |
| 44 | SLC12A1        | 2.91E-03    | 0.006862144 |
| 45 | RP11-54O7.1    | 2.87E-03    | 0.005907141 |
| 46 | NGEF           | 2.68E-03    | 4.21E-08    |
| 47 | TNXB           | 2.67E-03    | 2.32E-34    |
| 48 | RP11-867G23.13 | 2.21E-03    | 0.003772818 |
| 49 | SGCA           | 2.17E-03    | 0.003216729 |
| 50 | A2M            | 1.91E-03    | 0.002466572 |
| 51 | ACAN           | 1.88E-03    | 3.59E-83    |
| 52 | MMP28          | 1.67E-03    | 0.003483961 |
| 53 | AGT            | 1.44E-03    | 0.001393738 |
| 54 | CLEC3B         | 1.14E-03    | 3.14E-17    |
| 55 | SEMA5B         | 1.09E-03    | 0.00134425  |
| 56 | COMP           | 9.33E-04    | 2.11E-18    |
| 57 | KRT16          | 5.59E-04    | 5.28E-22    |
| 58 | CMKLR1         | 3.80E-04    | 0.000108071 |
| 59 | PI16           | 3.54E-04    | 7.37E-05    |
| 60 | ACTC1          | 3.12E-04    | 1.33E-19    |

**Persistent stimulation of MSCs with TNF $\alpha$ +IL-1 $\beta$ : 60 top down-regulated genes**

Human MSCs were exposed to persistent TNF $\alpha$ +IL-1 $\beta$  stimulation (concentrations as in Fig. 1) or to vehicles for 14-18 days. mRNA expression was determined by transcriptome analyses performed with 3 independent biological repeats. Differentially expressed genes were determined as those having p.adj<0.05 values. The Table presents the 60 top down-regulated genes following TNF $\alpha$ +IL-1 $\beta$  stimulation, compared to treatment by vehicle.

**Supplementary Table S3**

|    | Protein  | Fold change | p value  |
|----|----------|-------------|----------|
| 1  | POSTN    | 584.26      | 0.008413 |
| 2  | MMP3     | 449.01      | 0.003417 |
| 3  | AKAP12   | 370.01      | 5.68E-05 |
| 4  | SERPINA9 | 357.71      | 0.001463 |
| 5  | PAPPA    | 298.43      | 0.000383 |
| 6  | C3       | 243.25      | 0.005594 |
| 7  | CCL2     | 179.20      | 0.002724 |
| 8  | ICAM1    | 178.73      | 7.48E-07 |
| 9  | CXCL8    | 164.42      | 0.000579 |
| 10 | CXCL1    | 140.92      | 0.001972 |
| 11 | STAT1    | 130.05      | 0.000498 |
| 12 | SOD2     | 107.95      | 0.000442 |
| 13 | SERPINB2 | 103.71      | 0.000287 |
| 14 | STC2     | 96.12       | 0.000731 |
| 15 | CXCL6    | 87.91       | 0.009524 |
| 16 | COL7A1   | 80.83       | 0.004863 |
| 17 | CCL5     | 79.89       | 0.000121 |
| 18 | TFPI2    | 72.85       | 0.021876 |
| 19 | AKR1B1   | 66.81       | 0.009847 |
| 20 | IL6      | 66.38       | 0.000142 |
| 21 | LAMC2    | 55.41       | 0.004507 |
| 22 | PLOD2    | 54.60       | 0.006475 |
| 23 | PSME1    | 51.90       | 0.01911  |
| 24 | STC1     | 51.12       | 0.011134 |
| 25 | MMP1     | 47.43       | 0.009006 |
| 26 | CNN1     | 42.65       | 0.000105 |
| 27 | HSPA9    | 42.27       | 0.015654 |
| 28 | CSRP2    | 40.51       | 0.002324 |
| 29 | TGFB2    | 40.05       | 0.004729 |
| 30 | ST3GAL1  | 36.66       | 0.009742 |

|    | Protein     | Fold change | p value  |
|----|-------------|-------------|----------|
| 31 | HEBP1       | 33.58       | 0.003385 |
| 32 | NT5E        | 32.77       | 0.000411 |
| 33 | PRDX6       | 29.05       | 0.00195  |
| 34 | ESM1        | 28.74       | 0.046582 |
| 35 | NRP2        | 28.25       | 0.001512 |
| 36 | CCT6A       | 27.02       | 0.001061 |
| 37 | NAMPT       | 26.98       | 0.008358 |
| 38 | PRDX3       | 26.70       | 0.018936 |
| 39 | NARS        | 26.56       | 0.004492 |
| 40 | LIF         | 26.47       | 0.00664  |
| 41 | PDIA4       | 26.26       | 0.03104  |
| 42 | AKAP2       | 26.20       | 0.001243 |
| 43 | ATP5B       | 25.24       | 0.007947 |
| 44 | MCAM        | 25.23       | 0.014412 |
| 45 | TWSG1       | 24.93       | 0.012569 |
| 46 | PAFAH1B2    | 24.85       | 0.014905 |
| 47 | GREM1       | 24.39       | 0.000833 |
| 48 | CNDP2       | 23.60       | 0.000237 |
| 49 | GNB2L1      | 23.30       | 0.029093 |
| 50 | PFKP        | 22.84       | 0.011232 |
| 51 | HYOU1       | 22.15       | 5.37E-05 |
| 52 | ANXA5       | 22.00       | 0.04737  |
| 53 | GSTO1       | 21.73       | 0.030157 |
| 54 | LIN7C;LIN7A | 21.56       | 9.46E-06 |
| 55 | CXCL2       | 21.41       | 0.00828  |
| 56 | VPS35       | 20.50       | 0.00988  |
| 57 | SLIT2       | 20.08       | 0.005472 |
| 58 | UCHL1       | 19.43       | 0.000692 |
| 59 | CMPK1       | 19.35       | 0.038493 |
| 60 | MYLK        | 19.25       | 0.002582 |

**Persistent stimulation of MSCs with TNF $\alpha$ +IL-1 $\beta$ : 60 top up-regulated secreted proteins**

Human MSCs were exposed to persistent TNF $\alpha$ +IL-1 $\beta$  stimulation (concentrations as in Fig. 1) or to vehicles for 18-19 days. The expression of secreted proteins was determined by secretome analyses performed with 3 independent biological repeats. Differentially expressed secreted proteins were determined as those having p<0.05 values. The Table presents the 60 top up-regulated secreted proteins following TNF $\alpha$ +IL-1 $\beta$  stimulation, compared to treatment by vehicle.

**Supplementary Table 4**

|    | Protein  | Fold change | p value  |
|----|----------|-------------|----------|
| 1  | CKB      | 0.33        | 0.00673  |
| 2  | FMOD     | 0.32        | 0.02719  |
| 3  | TIMP1    | 0.32        | 6.41E-05 |
| 4  | SULF1    | 0.31        | 0.012103 |
| 5  | CRLF1    | 0.31        | 0.038214 |
| 6  | KRT7     | 0.30        | 0.028684 |
| 7  | CEMIP    | 0.30        | 0.010892 |
| 8  | FNDC1    | 0.28        | 0.036441 |
| 9  | DCN      | 0.28        | 0.001995 |
| 10 | LTBP2    | 0.26        | 0.014139 |
| 11 | PLXDC2   | 0.24        | 0.040743 |
| 12 | MEGF6    | 0.24        | 0.039836 |
| 13 | CXCL12   | 0.23        | 0.002151 |
| 14 | FST      | 0.21        | 0.036686 |
| 15 | SSC5D    | 0.20        | 0.00955  |
| 16 | BGN      | 0.20        | 0.004965 |
| 17 | GSTP1    | 0.20        | 0.000396 |
| 18 | VASN     | 0.19        | 0.002773 |
| 19 | CCDC80   | 0.18        | 0.001825 |
| 20 | SERPINE2 | 0.18        | 0.000269 |
| 21 | SERPINF1 | 0.18        | 0.014529 |
| 22 | ITGBL1   | 0.16        | 0.000906 |
| 23 | CD109    | 0.14        | 0.016153 |
| 24 | LUM      | 0.14        | 0.006344 |
| 25 | CD248    | 0.14        | 0.000137 |
| 26 | CLU      | 0.14        | 0.029361 |
| 27 | LOXL4    | 0.14        | 0.005092 |
| 28 | THBS2    | 0.14        | 0.000174 |
| 29 | WISP2    | 0.13        | 0.018388 |
| 30 | SEMA3C   | 0.13        | 1.32E-05 |

|    | Protein | Fold change | p value  |
|----|---------|-------------|----------|
| 31 | HAPLN1  | 0.13        | 0.005343 |
| 32 | COL12A1 | 0.12        | 0.001276 |
| 33 | CST6    | 0.12        | 0.000115 |
| 34 | PCOLCE  | 0.12        | 0.033427 |
| 35 | SVEP1   | 0.11        | 0.007808 |
| 36 | PAMR1   | 0.10        | 0.018589 |
| 37 | MFGE8   | 0.10        | 0.003699 |
| 38 | CFD     | 0.10        | 0.000232 |
| 39 | TNXB    | 0.07        | 0.033837 |
| 40 | ZNF683  | 0.06        | 0.023894 |
| 41 | OLFML2B | 0.06        | 0.022552 |
| 42 | ENPP2   | 0.05        | 0.024361 |
| 43 | IGFBP2  | 0.05        | 0.006658 |
| 44 | FGF7    | 0.05        | 0.003583 |
| 45 | FBLN5   | 0.05        | 0.008217 |
| 46 | FBLN1   | 0.04        | 0.000378 |
| 47 | MASP1   | 0.04        | 0.000458 |
| 48 | CRIP1   | 0.04        | 0.000157 |
| 49 | SCUBE3  | 0.04        | 0.016851 |
| 50 | COL14A1 | 0.04        | 0.006045 |
| 51 | COL11A1 | 0.03        | 0.000149 |
| 52 | ISLR    | 0.03        | 0.013719 |
| 53 | EFEMP1  | 0.03        | 0.002402 |
| 54 | IGFBP6  | 0.03        | 0.000873 |
| 55 | PODN    | 0.03        | 0.025621 |
| 56 | THBS3   | 0.02        | 0.008996 |
| 57 | ELN     | 0.02        | 0.000552 |
| 58 | ACAN    | 0.01        | 0.001192 |
| 59 | COMP    | 0.01        | 0.001226 |
| 60 | CLEC3B  | 0.00        | 0.0018   |

**Persistent stimulation of MSCs with TNF $\alpha$ +IL-1 $\beta$ : 60 top down-regulated secreted proteins**

Human MSCs were exposed to persistent TNF $\alpha$ +IL-1 $\beta$  stimulation (concentrations as in Fig. 1) or to vehicles for 18-19 days. The expression of secreted proteins was determined by secretome analyses performed with 3 independent biological repeats. Differentially expressed secreted proteins were determined as those having p<0.05 values. The Table presents the 60 top down-regulated secreted proteins following TNF $\alpha$ +IL-1 $\beta$  stimulation, compared to treatment by vehicle.
